# Supplementary material for: T cell-recruiting triplebody 19-3-19 mediates serial lysis of malignant B-lymphoid cells by a single T cell
Source: PubMed Central journal article supplement (PMC4171644; doi:10.18632/oncotarget.2238), 2014-07-23
Supplement: oncotarget-05-6466-s001.pdf [file oncotarget-05-6466-s001.pdf]

## SUPPLEMENTARY TABLE

**Supplementary Table S1. Computed protein characteristics of the T cell-engaging bispecific scFv molecules and triplebodies.** Protein parameters calculated from the primary sequences of the engineered T cell-engaging BiTEs and triplebodies with the ProtParam (<http://web.expasy.org/protparam/>) and PeptideCutter ([http://web.expasy.org/peptide\\_cutter/](http://web.expasy.org/peptide_cutter/)) tools[41].

| Protein     | Length [aa] | MW [kDa] | $\epsilon$ [ $M^{-1}cm^{-1}$ ] | computed pI | Construct | Relevant Proteinases                                                               |
|-------------|-------------|----------|--------------------------------|-------------|-----------|------------------------------------------------------------------------------------|
| 19-3        | 572         | 60.747   | 117,620                        | 8.52        |           | Chymotrypsin, Clostripain, Pepsin, <i>Proline endopeptidase</i> (4 sites), Trypsin |
| 19-3-19     | 854         | 89.94    | 168,180                        | 8.53        |           | Chymotrypsin, Clostripain, Pepsin, <i>Proline endopeptidase</i> (5 sites), Trypsin |
| Her2-3      | 563         | 59.503   | 117,160                        | 8.66        |           | Chymotrypsin, Clostripain, Pepsin, <i>Proline endopeptidase</i> (4 sites), Trypsin |
| Her2-3-Her2 | 834         | 87.249   | 167,260                        | 8.71        |           | Chymotrypsin, Clostripain, Pepsin, <i>Proline endopeptidase</i> (5 sites), Trypsin |
